# Supplementary material
Source: MDPI journal article supplement (https://www.mdpi.com/2073-4468/5/2/7)
Supplement: s1 [file s1]

# Development and Characterization of New Species Cross-Reactive Anti-Sialoadhesin Monoclonal Antibodies

Marjorie De Schryver, Hanne Van Gorp, Inge Hoebeke, Bauke De Maeyer, Karen Ooms, Isabel Pintelon, Louis J. Maes, Paul Cos, Hans J. Nauwynck and Peter L. Delpitte

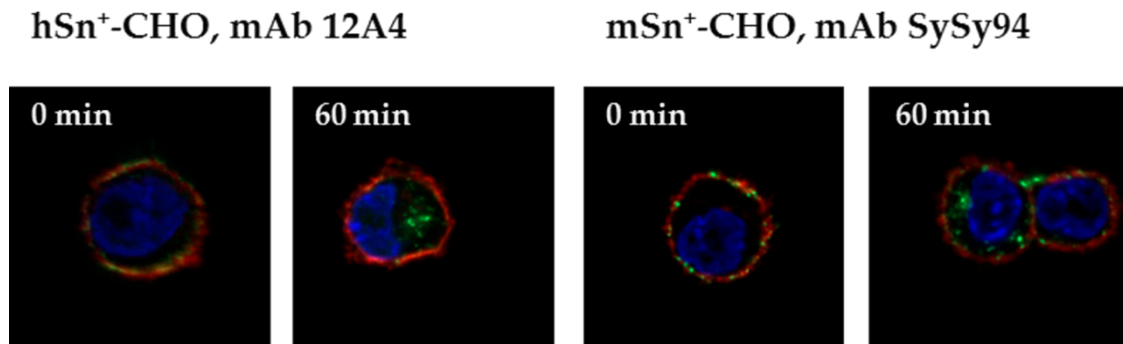

**Figure S1.** Internalization of Sn induced by Sn-specific mAbs. Newly developed mAbs 12A4 and SySy94 were added to the cells for 60 min at 4 °C to allow only surface staining. Cells were then fixed (0 min) or were brought to 37 °C to induce internalization (60 min). Cells were permeabilized so internalized vesicles could be observed. Secondary Alexa Fluor 488-labeled antibodies were added to the cells (green) along with Texas Red-X phalloidin (Life Technologies) to stain cortical actin (red). Nuclei were stained with 4',6-diamidino-2-phenylindole (DAPI) (blue).

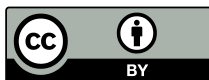

© 2016 by the authors; licensee MDPI, Basel, Switzerland. This article is an open access article distributed under the terms and conditions of the Creative Commons by Attribution (CC-BY) license (<http://creativecommons.org/licenses/by/4.0/>).
